# Supplementary material
Source: PubMed Central journal article supplement (PMC4992632)

**Appendix**  
**E-Cigarette Design Preference and Smoking Cessation: A U.S. Population Study**  
**Chen et al.**

**Appendix Figure 1A.** Photos of Closed System Designs

There are many types of e-cigarettes. See examples below. [Show pictures below]

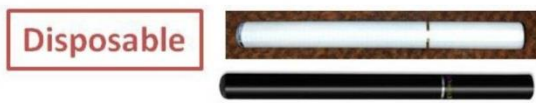

Looks like a cigarette; one-piece.

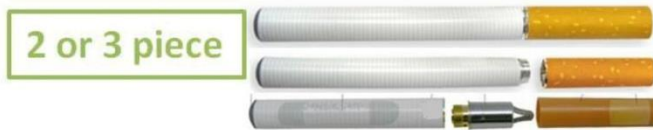

2 or 3 piece; consists of battery and cartomizer (or cartridge and atomizer).

**Appendix Figure 1B.** Photos of Open System Designs

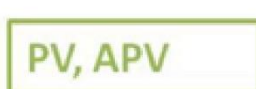

Personal vaporizer.  
Customizable. May  
be used with tanks,  
cartomizers,  
clearomizers, or drip  
tips.

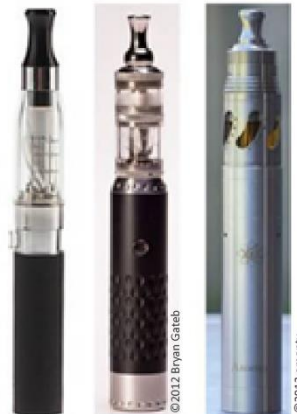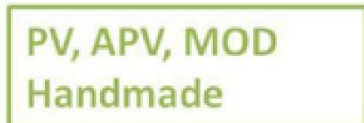

Personal vaporizer.  
Endlessly customizable.  
May be used with tanks,  
cartomizers, clearomizers,  
or drip tips.

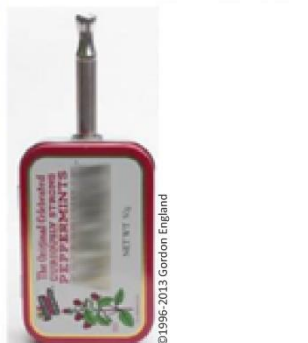

Supplement: NIHMS759117-supplement.pdf [file NIHMS759117-supplement.pdf]
